# Supplementary material
Source: Springer Nature journal article supplement (https://www.springermedizin.de/resource/supplementary/12887_2014_1009_MOESM2_ESM.pdf/9476940)
Supplement: MOESM2 [file 9476940]

Beginning with 0.05 units per kg weight  
before every main meal

Pre-prandial blood glucose measurements,  
2h - postprandial  
and also before the next main meal  
(6 measurements a day)  
before every main meal

Postprandial and before the  
next main meal,  
usually 60-160 mg/dl

Keep dose constant

Postprandial with 5 out 7 days >160  
mg/dl and no  
hypoglycemia until the next meal  
(blood glucose >50 mg/dl)

After 1 week, increase the dose  
before this meal by 10-20%  
(approximated to full or half units)  
and again evaluate the blood  
glucose level.  
After another week further dose  
increase may be advisable.

Postprandial or before the  
next main meal <50 mg/dl or  
symptomatic hypoglycemia

The next day,  
decrease the dose by 10-20%  
(approximated to full or half units)  
before this meal.  
Re-evaluate the blood glucose level.  
A dose adjustment may be  
necessary.
